# Supplementary material for: Stably dispersed high-temperature Fe3O4/silicone-oil nanofluids for direct solar thermal energy harvesting
Source: Royal Society of Chemistry journal article supplement (doi:10.1039/c6ta07773k), 2016-01-01
Supplement: c6ta07773k1.pdf [file c6ta07773k1.pdf]

## Electronic Supplementary Information

# Stably Dispersed High-Temperature Fe<sub>3</sub>O<sub>4</sub>/Silicone Oil Nanofluids for Direct Solar Thermal Energy Harvest

Yingying Chen<sup>1</sup>, Xiaojun Quan<sup>2</sup>, Zhongyong Wang<sup>1</sup>, Chiahsun Lee<sup>1</sup>, Zizhao Wang<sup>1</sup>,  
Peng Tao<sup>1,\*</sup>, Chengyi Song<sup>1</sup>, Jianbo Wu<sup>1</sup>, Wen Shang<sup>1</sup> and Tao Deng<sup>1,\*</sup>

<sup>1</sup>State Key Laboratory of Metal Matrix Composites, School of Materials Science and Engineering, Shanghai Jiao Tong University, 800 Dongchuan Rd, Shanghai, 200240, P. R. China.

<sup>2</sup>MOE Key Laboratory for Power Machinery and Engineering, School of Mechanical Engineering, Shanghai Jiao Tong University, 800 Dongchuan Road, Shanghai 200240, P.R. China

\*Correspondence: [taopeng@sjtu.edu.cn](mailto:taopeng@sjtu.edu.cn); [dengtao@sjtu.edu.cn](mailto:dengtao@sjtu.edu.cn)

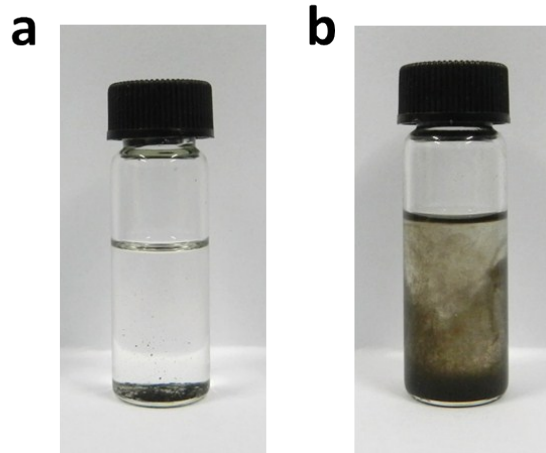

**Fig. S1** Photographs of carbon-based nanofluids with poor dispersion stability within silicone oil. (a) Precipitation of reduced graphene oxide (rGO) within silicone oil base fluid. (b) Sedimentation of oleylamine-modified rGO within silicone oil base fluid.

#### **Calculation of van der Waals attraction between NPs within silicone oil**

The non-retard Hamaker constant ( $A_i$ ) for component  $i$  (benzyl alcohol,  $\text{Fe}_3\text{O}_4$ , silicone) can be calculated using the following equation:

$$A_i = \frac{3}{4}k_B T \left( \frac{\varepsilon_i - \varepsilon_{vac}}{\varepsilon_i + \varepsilon_{vac}} \right)^2 + \frac{3h\nu_e (n_i^2 - n_{vac}^2)^2}{16\sqrt{2}(n_i^2 + n_{vac}^2)^{3/2}}$$

where  $\varepsilon_i$  and  $\varepsilon_{vac}$  are the static dielectric constant of component  $i$  and vacuum,  $n_i$  and  $n_{vac}$  are the refractive index of component  $i$  and vacuum,  $k_B$  is the Boltzmann constant ( $1.38 \times 10^{-23}$  J/K),  $T$  is the absolute temperature,  $h$  is the Planck constant ( $6.62607004 \times 10^{-34}$  J·s) and  $\nu_e$  is the electronic absorption frequency ( $\sim 3 \times 10^{15}$  s $^{-1}$ ). The specific calculated Hamaker constant values are listed in Table S1.

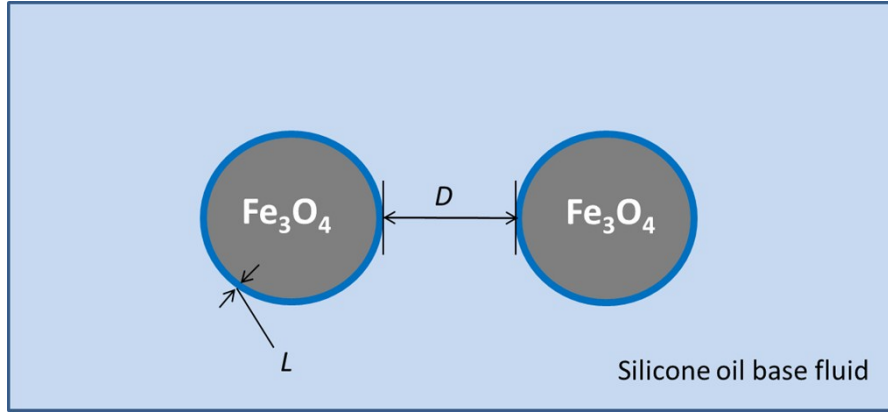

**Fig. S2** Schematic of inter-particle attraction within silicone oil base fluid.

The van der Waals attraction between two benzyl-alcohol modified  $\text{Fe}_3\text{O}_4$  NPs in the silicone oil base fluid can be estimated by:

$$V_{vdW} \cong -\frac{r}{12} \left[ \frac{(\sqrt{A_{\text{silicone}}} - \sqrt{A_{\text{benzyl alcohol}}})^2}{D} + \frac{(\sqrt{A_{\text{benzyl alcohol}}} - \sqrt{A_{\text{Fe}_3\text{O}_4 \text{ NP}}})^2}{D + 2L} \right]$$

where  $r$  is the radius of NPs (4.5 nm), and the separation distance (when they are in van der Waals contact) between two neighboring  $D$  is typically taken as 0.165 nm. The capping layer thickness  $L$  can be calculated by assuming the benzyl-alcohol modified NPs are core-shell structure. The density of  $\text{Fe}_3\text{O}_4$  NPs and benzyl alcohol are 5.17  $\text{g}/\text{cm}^3$  and 1.044  $\text{g}/\text{cm}^3$ , respectively. According to 10 wt% TGA weight loss from benzyl alcohol,  $L$  is estimated to be 0.708 nm. With these parameters, the van der Waals attraction between two benzyl-alcohol modified  $\text{Fe}_3\text{O}_4$  NPs in the silicone oil base fluid is estimated to be  $\sim 9.45 k_B T$ .

The non-retard Hamaker constant for the hybrid surface coating layer PDMS-grafted  $\text{Fe}_3\text{O}_4$  NPs:

$$A_{eff} = \frac{3}{4} k_B T \left( \frac{\varepsilon_{eff} - \varepsilon_{vac}}{\varepsilon_{eff} + \varepsilon_{vac}} \right)^2 + \frac{3h\nu_e (n_{eff}^2 - n_{vac}^2)^2}{16\sqrt{2}(n_{eff}^2 + n_{vac}^2)^{3/2}}$$

The effective dielectric constant of the hybrid PDMS-benzyl alcohol layer can be estimated by:

$$\log(\varepsilon_{eff}) = \varphi_{BA} \times \log(\varepsilon_{BA}) + \varphi_{PDMS} \times \log(\varepsilon_{PDMS})$$

The effective refractive index of the hybrid PDMS-benzyl alcohol layer can be estimated by:

$$n_{eff} = \varphi_{BA} \times n_{BA} + \varphi_{PDMS} \times n_{PDMS}$$

The corresponding van der Waals attraction between two PDMS-modified Fe<sub>3</sub>O<sub>4</sub> NPs in the silicone oil base fluid can be estimated by:

$$V_{vdW} \cong -\frac{r}{12} \left[ \frac{(\sqrt{A_{silicone}} - \sqrt{A_{hybrid\ layer}})^2}{D} + \frac{(\sqrt{A_{hybrid\ layer}} - \sqrt{A_{Fe3O4\ NP}})^2}{D + 2L} + \dots \right]$$

The capping layer thickness  $L$  can be calculated by assuming the PDMS-modified NPs are core-shell structure with a hybrid surface coating layer of mixed PDMS and benzyl alcohol. The density of the grafted PDMS is 0.98 g/cm<sup>3</sup>. Based on the total 42.3 wt% TGA weight loss from benzyl alcohol (5 wt%) and grafted PDMS (37.3wt%), assuming half of the benzyl alcohol synthetic ligands were replaced by grafted PDMS ligands,  $L$  is estimated to be 3.17 nm. With these parameters, the van der Waals attraction between two benzyl-alcohol modified Fe<sub>3</sub>O<sub>4</sub> NPs in the silicone oil base fluid is estimated to be  $\sim 1.78 k_B T$ .

**Table S1.** Calculation of Hamaker constant of each component

| Component                      | $\epsilon$ | $n$  | $A$ (10 <sup>-20</sup> J) |
|--------------------------------|------------|------|---------------------------|
| Fe <sub>3</sub> O <sub>4</sub> | 14.2       | 2.42 | 34.85                     |
| Benzyl alcohol                 | 13         | 1.54 | 8.24                      |
| Silicone oil                   | 2.4        | 1.41 | 5.03                      |
| Hybrid layer                   | 2.89       | 1.42 | 5.72                      |

## Estimation of sedimentation velocity

The Stokes sedimentation velocity ( $V$ ) of pure  $\text{Fe}_3\text{O}_4$  NPs within silicone oil base fluid

can be estimated by  $V = \frac{r^2}{9\mu}(\rho_{NP} - \rho_{Medium})g$ , where  $\rho_{NP}$  and  $\rho_{Medium}$  are densities of the NPs ( $5.17 \text{ g/cm}^3$ ) and base fluid ( $0.959 \text{ g/cm}^3$ ), respectively and  $\mu$  is the dynamic viscosity of the nanofluid ( $47.95 \text{ cP}$ ).

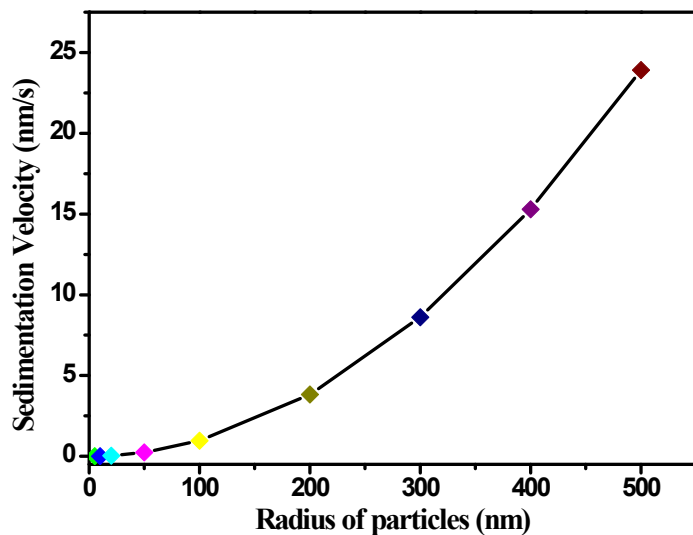

Fig. S3 Sedimentation velocity as a function of particle size in silicone oil.

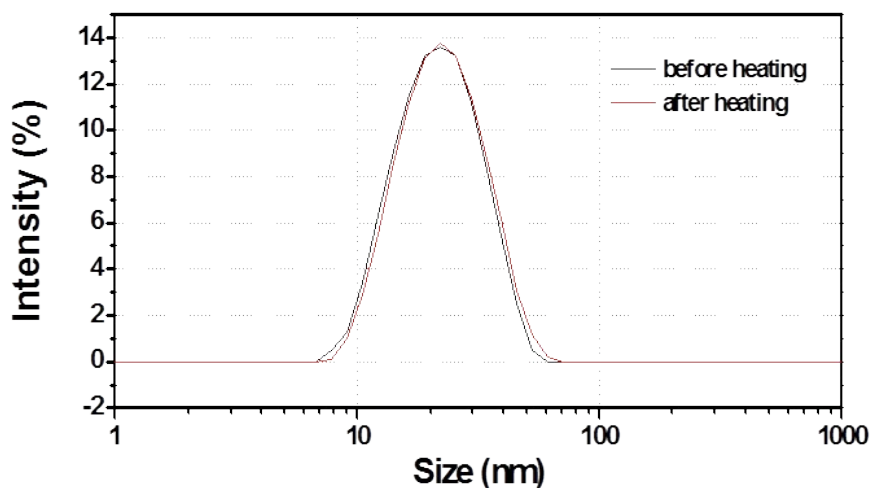

Fig. S4 DLS measurement of PDMS-grafted  $\text{Fe}_3\text{O}_4$  NPs within silicone oil ( $0.75 \text{ mg/mL}$ ) before and after thermal aging at  $120 \text{ }^\circ\text{C}$  for 12 h.

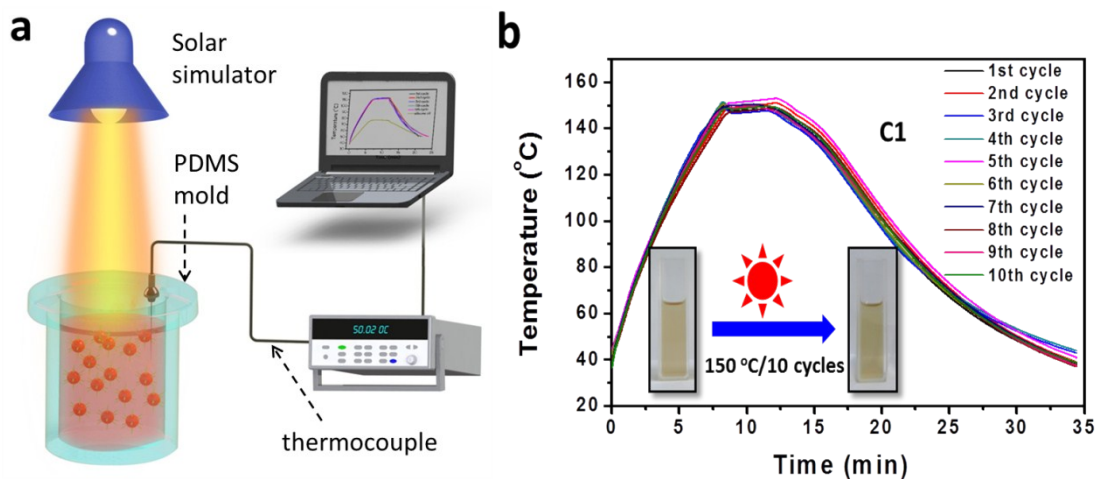

**Fig. S5** (a) Schematic of experimental setup for solar-thermal harvest with nanofluids. (b) Solar-thermal harvest with silicone oil nanofluids (C1: 0.75 mg/ml) at an operation temperature of 150 °C.

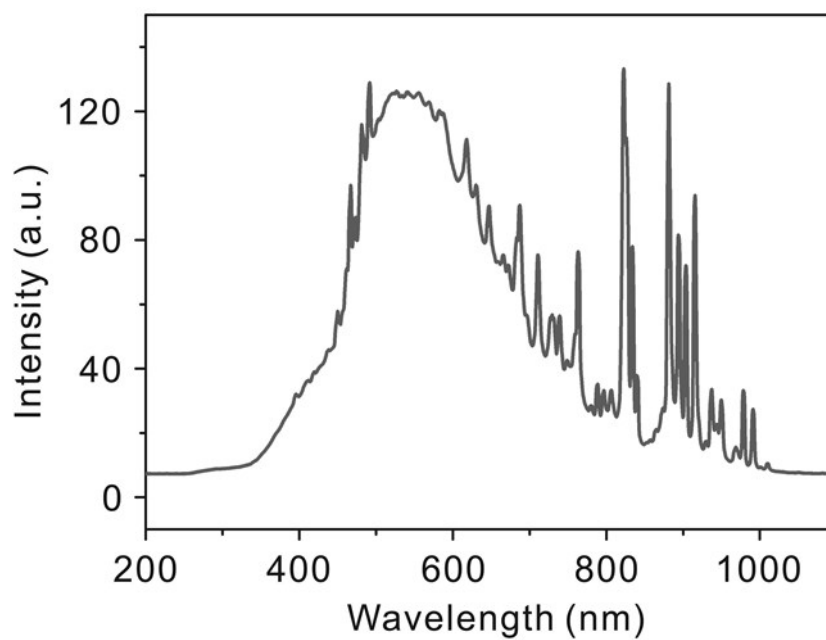

**Fig. S6** Emission spectrum of solar simulator.

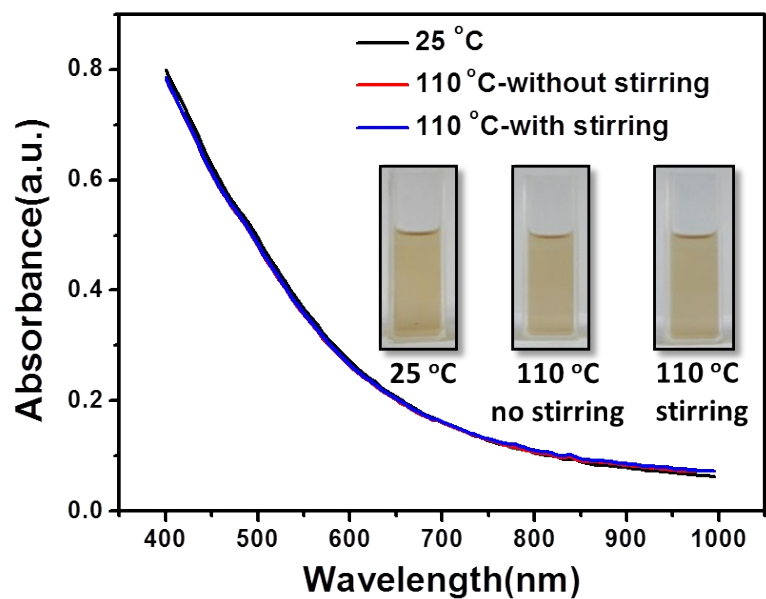

**Fig. S7** Absorption spectra of Fe<sub>3</sub>O<sub>4</sub>/silicone oil nanofluids (C1: 0.75 mg/mL) aging at 110 °C under stirred and non-stirred state. The inset shows the photographs of the nanofluids indicating consistently stable dispersion.
